# Supplementary material
Source: PubMed Central journal article supplement (PMC2605171)
Supplement: NIHMS66103-supplement-Sup_Figure_1.pdf [file NIHMS66103-supplement-Sup_Figure_1.pdf]

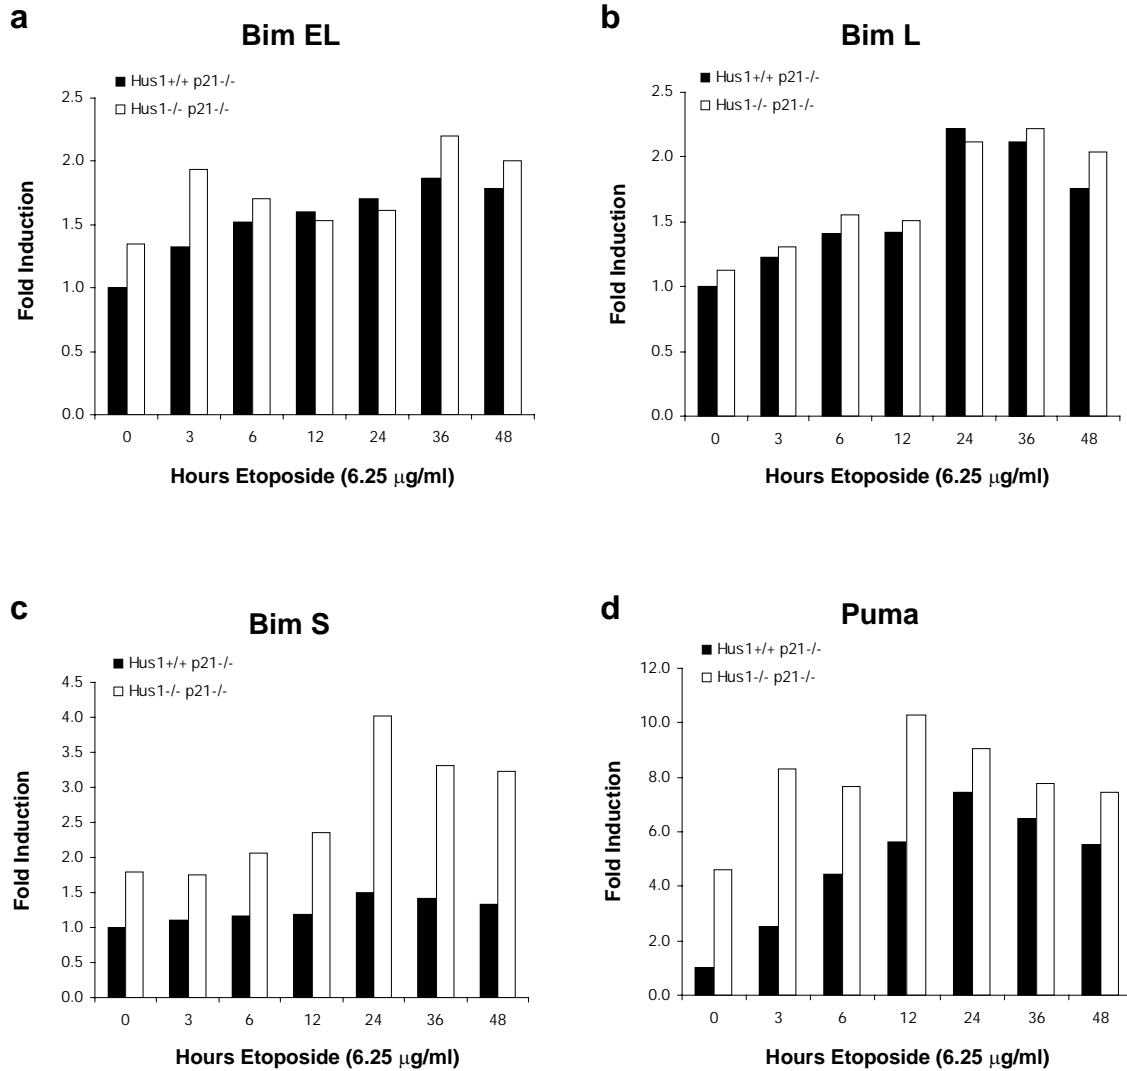

**Supplementary Figure 1** Bim and Puma mRNAs are upregulated to a greater extent in *Hus1*-deficient cells in response to etoposide treatment. The expression levels of Bim and Puma mRNAs were normalized to that of GAPDH. Quantification of (a) BimEL, (b) BimL, (c) BimS in Figure 2b. (d) Quantification of Puma in Figure 2c.
